# Supplementary material for: Lipopolysaccharide-Induced Strain-Specific Differences in Neuroinflammation and MHC-I Pathway Regulation in the Brains of Bl6 and 129Sv Mice
Source: MDPI journal article supplement (doi:10.3390/cells11061032), 2022-03-18
Supplement: s1 [file s1]

# Supplementary

Maria Piirsalu, Keerthana Chithanathan, Mohan Jayaram, Tanel Visnapuu, Kersti Lilleväli, Mihkel Zilmer and Eero Vasar

## Lipopolysaccharide-induced strain-specific differences in neuroinflammatory status and MHC-I pathway regulation in the brains of Bl6 and 129Sv mice

**Table S1.** Pearson's correlation analysis between 24 h body weight change ( $\Delta$ BW), body temperature change ( $\Delta$ BT) and 24 h locomotor activity parameters.

|                                | Pearson r<br>( <i>p</i> value) |                |                 |                 |                 |                 |                 |                |
|--------------------------------|--------------------------------|----------------|-----------------|-----------------|-----------------|-----------------|-----------------|----------------|
|                                | Bl6 saline                     |                | Bl6 LPS         |                 | 129Sv saline    |                 | 129Sv LPS       |                |
|                                | $\Delta$ BW                    | $\Delta$ BT    | $\Delta$ BW     | $\Delta$ BT     | $\Delta$ BW     | $\Delta$ BT     | $\Delta$ BW     | $\Delta$ BT    |
| Total distance                 | 0,35<br>(0,49)                 | 0,12<br>(0,82) | -0,19<br>(0,75) | 0,40<br>(0,51)  | -0,06<br>(0,88) | 0,38<br>(0,35)  | -0,64<br>(0,12) | 0,05<br>(0,92) |
| Total distance in center       | 0,47<br>(0,34)                 | 0,29<br>(0,58) | 0,19<br>(0,76)  | -0,47<br>(0,43) | -0,19<br>(0,65) | -0,13<br>(0,76) | -0,54<br>(0,21) | 0,44<br>(0,28) |
| Time spent moving, total arena | 0,22<br>(0,68)                 | 0,21<br>(0,69) | -0,69<br>(0,20) | -0,27<br>(0,65) | -0,42<br>(0,30) | -0,03<br>(0,94) | -0,63<br>(0,13) | 0,13<br>(0,77) |
| Time spent moving, periphery   | 0,13<br>(0,80)                 | 0,09<br>(0,87) | -0,79<br>(0,11) | -0,15<br>(0,81) | -0,38<br>(0,36) | 0,003<br>(0,99) | -0,61<br>(0,15) | 0,10<br>(0,82) |
| Time spent moving, center      | 0,52<br>(0,29)                 | 0,56<br>(0,24) | -0,37<br>(0,54) | -0,47<br>(0,43) | -0,44<br>(0,27) | -0,30<br>(0,46) | -0,59<br>(0,16) | 0,31<br>(0,46) |

**Table S2.** Pearson's correlation coefficient matrices of MHC-I gene expressions and body weight ( $\Delta$ BW) and body temperature ( $\Delta$ BT) change in olfactory bulb (OB), hippocampus (HPC), hypothalamus (HT), midbrain (MB), frontal cortex (FC) and cerebellum (CBL) of B16 and 129Sv mice. Statistically significant results are indicated in bold ( $p \leq 0.05$ ).

| <b>B16 OB</b>   |             |             |             |             |             |             |             |
|-----------------|-------------|-------------|-------------|-------------|-------------|-------------|-------------|
|                 | $\Delta$ BW | $\Delta$ BT | B2m         | TapBP       | Tap1        | Tap2        | Lmp2        |
| $\Delta$ BW     | 1           | 0,54        | <b>0,77</b> | <b>0,74</b> | <b>0,66</b> | 0,57        | 0,58        |
| $\Delta$ BT     | 0,54        | 1           | 0,60        | 0,49        | 0,46        | 0,55        | 0,55        |
| B2m             | <b>0,77</b> | 0,60        | 1           | <b>0,93</b> | <b>0,83</b> | <b>0,81</b> | <b>0,90</b> |
| TapBP           | <b>0,74</b> | 0,49        | <b>0,93</b> | 1           | <b>0,91</b> | <b>0,94</b> | <b>0,91</b> |
| Tap1            | <b>0,66</b> | 0,46        | <b>0,83</b> | <b>0,91</b> | 1           | <b>0,97</b> | <b>0,92</b> |
| Tap2            | 0,57        | 0,55        | <b>0,81</b> | <b>0,94</b> | <b>0,97</b> | 1           | <b>0,93</b> |
| Lmp2            | 0,58        | 0,55        | <b>0,90</b> | <b>0,91</b> | <b>0,92</b> | <b>0,93</b> | 1           |
| <b>129Sv OB</b> |             |             |             |             |             |             |             |
|                 | $\Delta$ BW | $\Delta$ BT | B2m         | TapBP       | Tap1        | Tap2        | Lmp2        |
| $\Delta$ BW     | 1           | 0,35        | -0,14       | 0,39        | -0,19       | -0,33       | 0,06        |
| $\Delta$ BT     | 0,35        | 1           | -0,56       | 0,04        | -0,55       | -0,62       | 0,11        |
| B2m             | -0,14       | -0,56       | 1           | 0,64        | 0,20        | 0,53        | -0,29       |
| TapBP           | 0,39        | 0,04        | 0,64        | 1           | -0,04       | 0,24        | 0,51        |
| Tap1            | -0,19       | -0,55       | 0,20        | -0,04       | 1           | <b>0,87</b> | 0,28        |
| Tap2            | -0,33       | -0,62       | 0,53        | 0,24        | <b>0,87</b> | 1           | 0,11        |
| Lmp2            | 0,06        | 0,11        | -0,29       | 0,51        | 0,28        | 0,11        | 1           |
| <b>B16 HPC</b>  |             |             |             |             |             |             |             |
|                 | $\Delta$ BW | $\Delta$ BT | B2m         | TapBP       | Tap1        | Tap2        | Lmp2        |
| $\Delta$ BW     | 1           | 0,54        | 0,08        | 0,41        | 0,41        | 0,51        | 0,48        |

|                  |             |             |             |             |             |             |             |
|------------------|-------------|-------------|-------------|-------------|-------------|-------------|-------------|
| $\Delta BT$      | 0,54        | 1           | 0,04        | 0,35        | 0,11        | 0,27        | -0,05       |
| B2m              | 0,08        | 0,04        | 1           | <b>0,74</b> | <b>0,86</b> | 0,49        | 0,25        |
| TapBP            | 0,41        | 0,35        | <b>0,74</b> | 1           | <b>0,87</b> | <b>0,75</b> | 0,15        |
| Tap1             | 0,41        | 0,11        | <b>0,86</b> | <b>0,87</b> | 1           | <b>0,79</b> | 0,33        |
| Tap2             | 0,51        | 0,27        | 0,49        | <b>0,75</b> | <b>0,79</b> | 1           | 0,06        |
| Lmp2             | 0,48        | -0,05       | 0,25        | 0,15        | 0,33        | 0,06        | 1           |
| <b>129Sv HPC</b> |             |             |             |             |             |             |             |
|                  | $\Delta BW$ | $\Delta BT$ | B2m         | TapBP       | Tap1        | Tap2        | Lmp2        |
| $\Delta BW$      | 1           | 0,35        | -0,10       | 0,02        | 0,19        | 0,18        | -0,41       |
| $\Delta BT$      | 0,35        |             | 0,15        | -0,49       | -0,21       | -0,05       | -0,47       |
| B2m              | -0,10       | 0,15        | 1           | 0,61        | 0,51        | <b>0,86</b> | 0,41        |
| TapBP            | 0,02        | -0,49       | 0,61        | 1           | 0,58        | 0,56        | 0,63        |
| Tap1             | 0,19        | -0,21       | 0,51        | 0,58        | 1           | 0,57        | 0,16        |
| Tap2             | 0,18        | -0,05       | <b>0,86</b> | 0,56        | 0,57        | 1           | 0,16        |
| Lmp2             | -0,41       | -0,47       | 0,41        | 0,63        | 0,16        | 0,16        | 1           |
| <b>B16 HT</b>    |             |             |             |             |             |             |             |
|                  | $\Delta BW$ | $\Delta BT$ | B2m         | TapBP       | Tap1        | Tap2        | Lmp2        |
| $\Delta BW$      | 1           | 0,54        | 0,15        | -0,03       | 0,49        | 0,41        | 0,42        |
| $\Delta BT$      | 0,54        | 1           | 0,00        | -0,31       | 0,11        | 0,09        | 0,25        |
| B2m              | 0,15        | 0,00        | 1           | <b>0,83</b> | <b>0,78</b> | <b>0,83</b> | <b>0,81</b> |
| TapBP            | -0,03       | -0,31       | <b>0,83</b> | 1           | 0,64        | 0,63        | 0,60        |
| Tap1             | 0,49        | 0,11        | <b>0,78</b> | 0,64        | 1           | <b>0,98</b> | <b>0,94</b> |
| Tap2             | 0,41        | 0,09        | <b>0,83</b> | 0,63        | <b>0,98</b> | 1           | <b>0,94</b> |
| Lmp2             | 0,42        | 0,25        | <b>0,81</b> | 0,60        | <b>0,94</b> | <b>0,94</b> | 1           |
| <b>129Sv HT</b>  |             |             |             |             |             |             |             |
|                  | $\Delta BW$ | $\Delta BT$ | B2m         | TapBP       | Tap1        | Tap2        | Lmp2        |

|                 |             |             |             |             |             |             |             |
|-----------------|-------------|-------------|-------------|-------------|-------------|-------------|-------------|
| $\Delta BW$     | 1           | 0,35        | 0,14        | -0,01       | -0,10       | -0,14       | -0,10       |
| $\Delta BT$     | 0,35        | 1           | 0,35        | 0,42        | 0,17        | 0,14        | -0,05       |
| B2m             | 0,14        | 0,35        | 1           | <b>0,73</b> | 0,61        | 0,43        | 0,35        |
| TapBP           | -0,01       | 0,42        | <b>0,73</b> | 1           | <b>0,90</b> | <b>0,88</b> | <b>0,72</b> |
| Tap1            | -0,10       | 0,17        | 0,61        | <b>0,90</b> | 1           | <b>0,94</b> | <b>0,91</b> |
| Tap2            | -0,14       | 0,14        | 0,43        | <b>0,88</b> | <b>0,94</b> | 1           | <b>0,91</b> |
| Lmp2            | -0,10       | -0,05       | 0,35        | <b>0,72</b> | <b>0,91</b> | <b>0,91</b> | 1           |
| <b>B16 MB</b>   |             |             |             |             |             |             |             |
|                 | $\Delta BW$ | $\Delta BT$ | B2m         | TapBP       | Tap1        | Tap2        | Lmp2        |
| $\Delta BW$     | 1           | 0,54        | 0,16        | 0,11        | 0,62        | 0,46        | <b>0,74</b> |
| $\Delta BT$     | 0,54        | 1           | 0,25        | -0,37       | 0,18        | 0,21        | <b>0,63</b> |
| B2m             | 0,16        | 0,25        | 1           | 0,38        | <b>0,65</b> | <b>0,63</b> | 0,45        |
| TapBP           | 0,11        | -0,37       | 0,38        | 1           | <b>0,68</b> | 0,61        | 0,23        |
| Tap1            | 0,62        | 0,18        | <b>0,65</b> | <b>0,68</b> | 1           | <b>0,75</b> | <b>0,78</b> |
| Tap2            | 0,46        | 0,21        | <b>0,63</b> | 0,61        | <b>0,75</b> | 1           | <b>0,73</b> |
| Lmp2            | <b>0,74</b> | <b>0,63</b> | 0,45        | 0,23        | <b>0,78</b> | <b>0,73</b> | 1           |
| <b>129Sv MB</b> |             |             |             |             |             |             |             |
|                 | $\Delta BW$ | $\Delta BT$ | B2m         | TapBP       | Tap1        | Tap2        | Lmp2        |
| $\Delta BW$     | 1           | 0,35        | 0,28        | 0,27        | 0,11        | 0,39        | -0,004      |
| $\Delta BT$     | 0,35        | 1           | -0,06       | 0,41        | -0,27       | 0,05        | -0,22       |
| B2m             | 0,28        | -0,06       | 1           | <b>0,82</b> | <b>0,75</b> | 0,40        | <b>0,80</b> |
| TapBP           | 0,27        | 0,41        | <b>0,82</b> | 1           | 0,43        | 0,33        | 0,54        |
| Tap1            | 0,11        | -0,27       | <b>0,75</b> | 0,43        | 1           | 0,27        | <b>0,96</b> |
| Tap2            | 0,39        | 0,05        | 0,40        | 0,33        | 0,27        | 1           | 0,30        |
| Lmp2            | -0,004      | -0,22       | <b>0,80</b> | 0,54        | <b>0,96</b> | 0,30        | 1           |

| B16 FC      |             |             |             |             |             |             |             |
|-------------|-------------|-------------|-------------|-------------|-------------|-------------|-------------|
|             | $\Delta BW$ | $\Delta BT$ | B2m         | TapBP       | Tap1        | Tap2        | Lmp2        |
| $\Delta BW$ | 1           | 0,54        | 0,00        | 0,11        | 0,41        | 0,31        | 0,55        |
| $\Delta BT$ | 0,54        | 1           | 0,13        | 0,21        | 0,18        | 0,19        | 0,44        |
| B2m         | 0,00        | 0,13        | 1           | <b>0,90</b> | 0,06        | 0,42        | 0,45        |
| TapBP       | 0,11        | 0,21        | <b>0,90</b> | 1           | 0,48        | 0,74        | <b>0,77</b> |
| Tap1        | 0,41        | 0,18        | 0,06        | 0,48        | 1           | <b>0,89</b> | <b>0,93</b> |
| Tap2        | 0,31        | 0,19        | 0,42        | <b>0,74</b> | <b>0,89</b> | 1           | <b>0,91</b> |
| Lmp2        | 0,55        | 0,44        | 0,45        | <b>0,77</b> | <b>0,93</b> | <b>0,91</b> | 1           |
| 129Sv FC    |             |             |             |             |             |             |             |
|             | $\Delta BW$ | $\Delta BT$ | B2m         | TapBP       | Tap1        | Tap2        | Lmp2        |
| $\Delta BW$ | 1           | 0,35        | 0,56        | <b>0,73</b> | <b>0,71</b> | 0,53        | <b>0,63</b> |
| $\Delta BT$ | 0,35        | 1           | -0,25       | -0,18       | -0,07       | -0,25       | -0,13       |
| B2m         | 0,56        | -0,25       | 1           | <b>0,85</b> | 0,62        | 0,61        | <b>0,92</b> |
| TapBP       | <b>0,73</b> | -0,18       | <b>0,85</b> | 1           | <b>0,81</b> | <b>0,86</b> | <b>0,91</b> |
| Tap1        | <b>0,71</b> | -0,07       | 0,62        | <b>0,81</b> | 1           | <b>0,83</b> | <b>0,69</b> |
| Tap2        | 0,53        | -0,25       | 0,61        | <b>0,86</b> | <b>0,83</b> | 1           | <b>0,76</b> |
| Lmp2        | <b>0,63</b> | -0,13       | <b>0,92</b> | <b>0,91</b> | <b>0,69</b> | <b>0,76</b> | 1           |
| B16 CBL     |             |             |             |             |             |             |             |
|             | $\Delta BW$ | $\Delta BT$ | B2m         | TapBP       | Tap1        | Tap2        |             |
| $\Delta BW$ | 1           | 0,54        | 0,44        | 0,16        | <b>0,65</b> | 0,23        |             |
| $\Delta BT$ | 0,54        | 1           | 0,54        | 0,16        | 0,31        | -0,09       |             |
| B2m         | 0,44        | 0,54        | 1           | 0,23        | <b>0,81</b> | 0,31        |             |
| TapBP       | 0,16        | 0,16        | 0,23        | 1           | 0,33        | -0,16       |             |
| Tap1        | <b>0,65</b> | 0,31        | <b>0,81</b> | 0,33        | 1           | 0,31        |             |
| Tap2        | 0,23        | -0,09       | 0,31        | -0,16       | 0,31        | 1           |             |

| 129Sv CBL   |             |             |       |       |       |       |
|-------------|-------------|-------------|-------|-------|-------|-------|
|             | $\Delta BW$ | $\Delta BT$ | B2m   | TapBP | Tap1  | Tap2  |
| $\Delta BW$ | 1           | 0,35        | 0,06  | -0,13 | 0,07  | 0,26  |
| $\Delta BT$ | 0,35        | 1           | -0,09 | -0,29 | 0,35  | 0,09  |
| B2m         | 0,06        | -0,09       | 1     | -0,02 | 0,47  | 0,23  |
| TapBP       | -0,13       | -0,29       | -0,02 | 1     | 0,27  | -0,25 |
| Tap1        | 0,07        | 0,35        | 0,47  | 0,27  | 1     | -0,30 |
| Tap2        | 0,26        | 0,09        | 0,23  | -0,25 | -0,30 | 1     |
